# Supplementary material
Source: publisher figshare collection journal article supplement (https://acs.figshare.com/ndownloader/files/5824326)

# Macromolecules

Macromolecules, 1998, 31(9), 2731-2743, DOI: [10.1021/ma971368s](https://doi.org/10.1021/ma971368s)

## Terms & Conditions

Electronic Supporting Information files are available without a subscription to ACS Web Editions. The American Chemical Society holds a copyright ownership interest in any copyrightable Supporting Information. Files available from the ACS website may be downloaded for personal use only. Users are not otherwise permitted to reproduce, republish, redistribute, or sell any Supporting Information from the ACS website, either in whole or in part, in either machine-readable form or any other form without permission from the American Chemical Society. For permission to reproduce, republish and redistribute this material, requesters must process their own requests via the RightsLink permission system. Information about how to use the RightsLink permission system can be found at <http://pubs.acs.org/page/copyright/permissions.html>

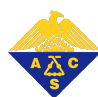

ACS Publications

MOST TRUSTED. MOST CITED. MOST READ.

Copyright © 1998 American Chemical Society

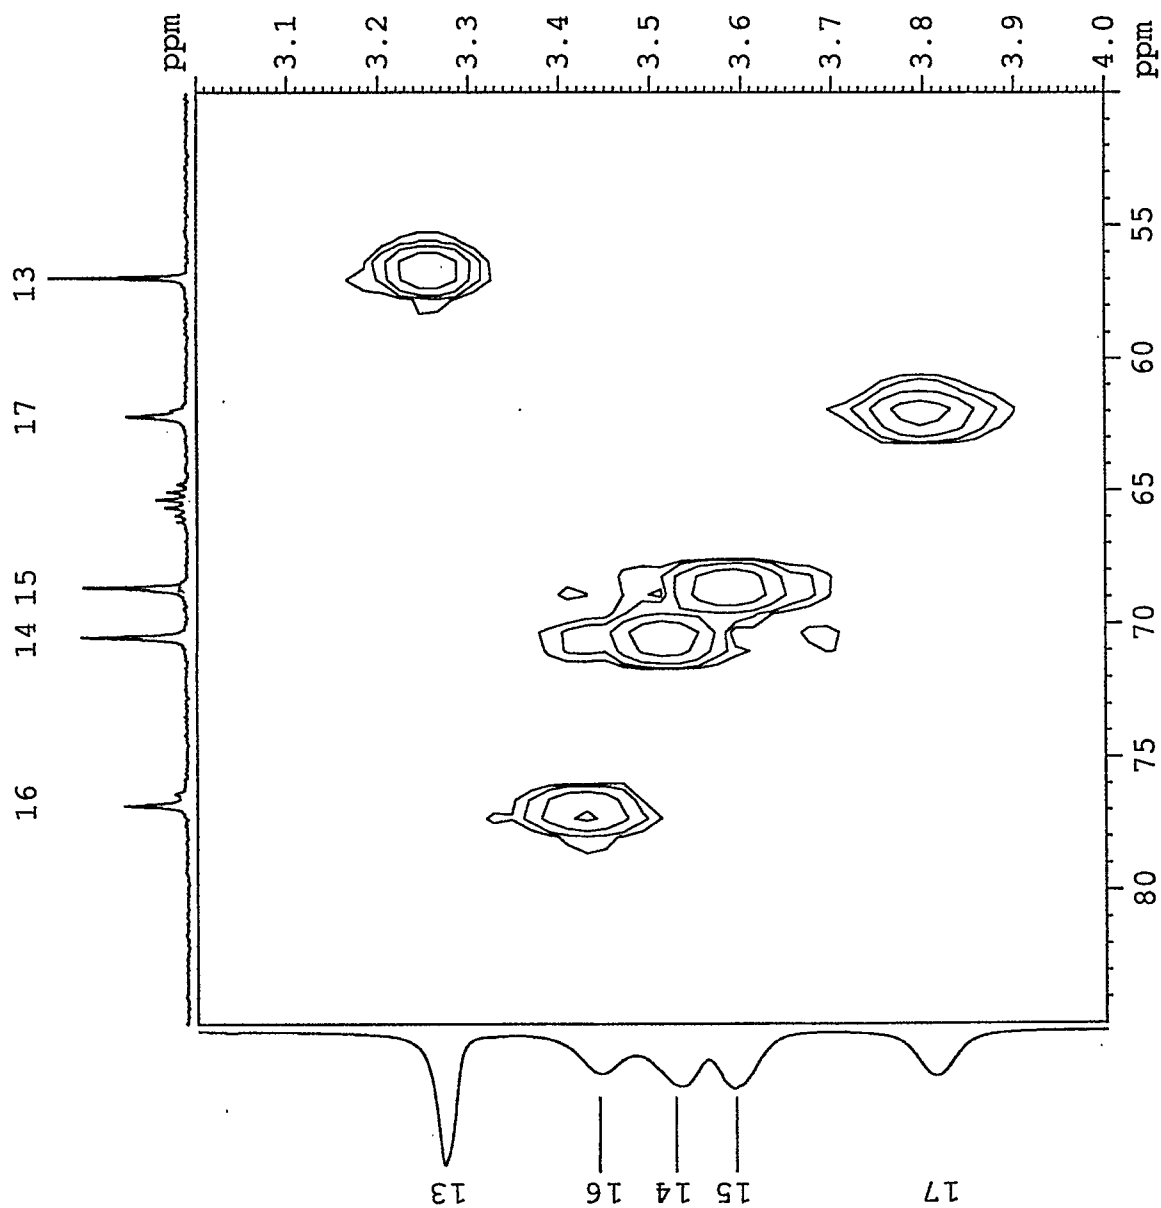

Page 1: :  $^1\text{H}$ - $^{13}\text{C}$  COSY(HETCOR) NMR spectrum of the 1M solution of **LiOEEM** in  $\text{THF-d}_8$  at 253 K.

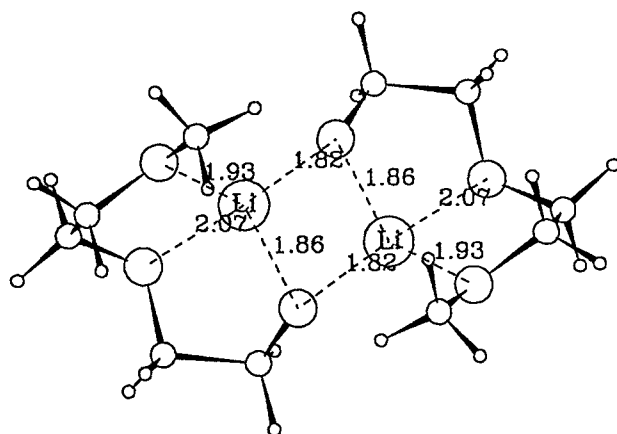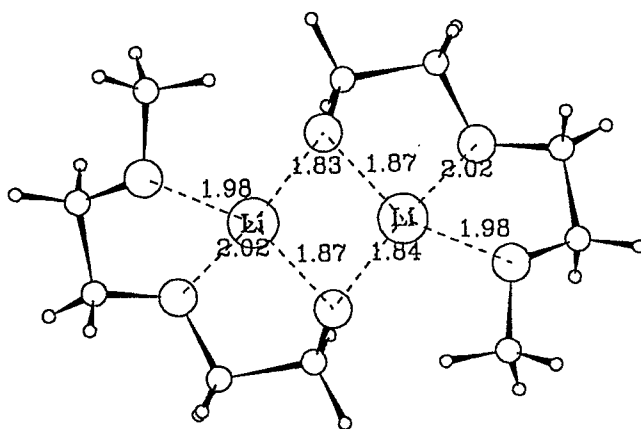

Page 2: Structures of two most stable dimeric aggregates of **LiOEEM** as predicted by *ab initio* SCF 3-21G calculations

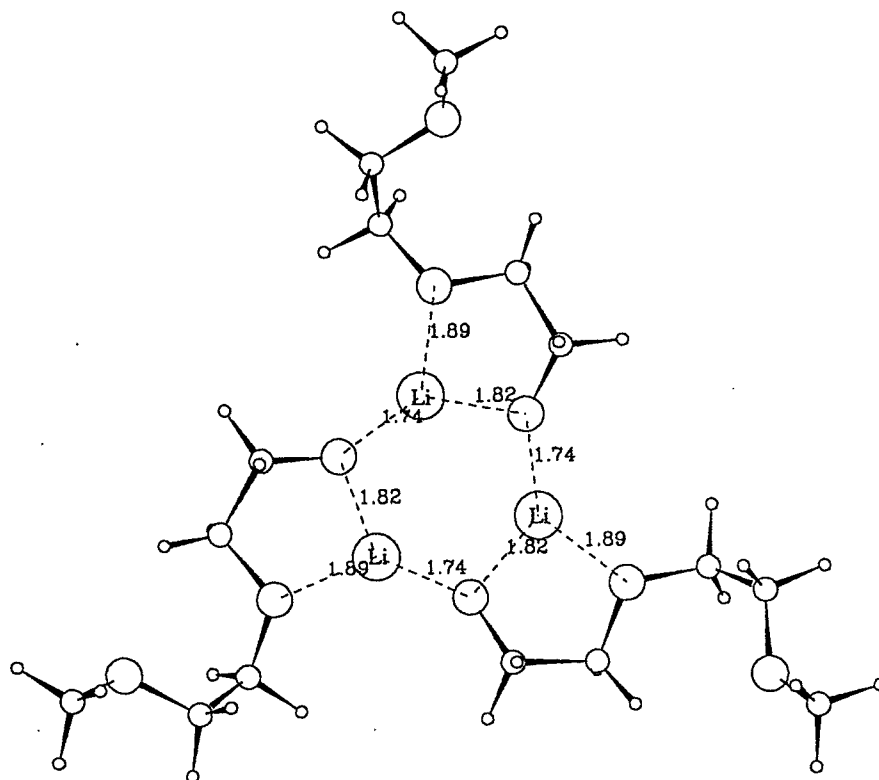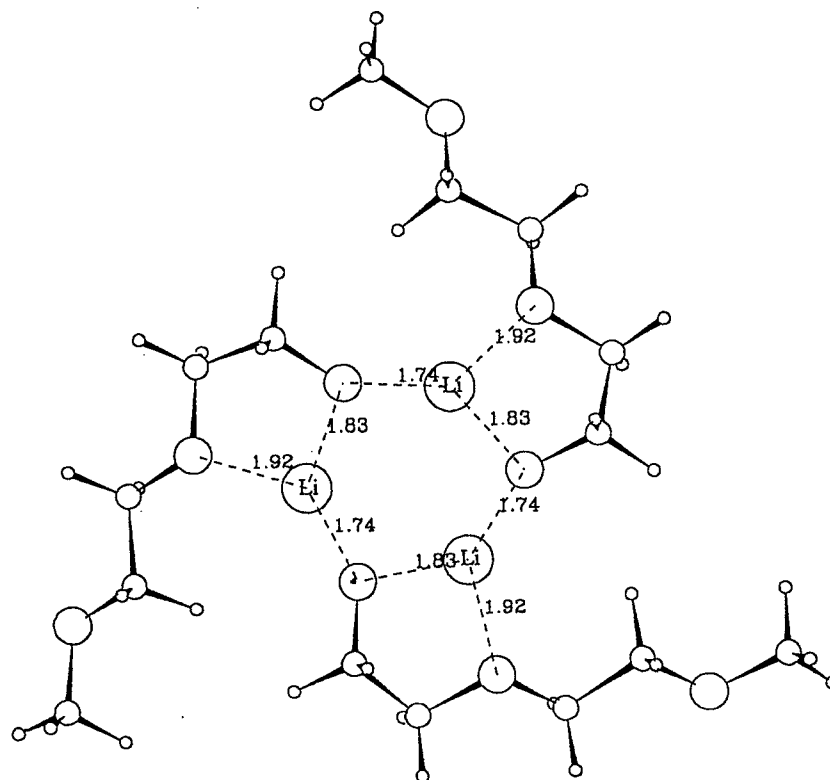

Page 3: Structures of two most (and almost equally) stable trimeric aggregates of **LiOEEM** as predicted by *ab initio* SCF 3-21G calculations

Page 4  $^1\text{H}$ - $^{13}\text{C}$  COSY(HETCOR) NMR spectrum of the mixture of **A** (0.2 mol/l) with 4 equivalents of **LIOEFM** in  $\text{THF-d}_8$  at 253 K

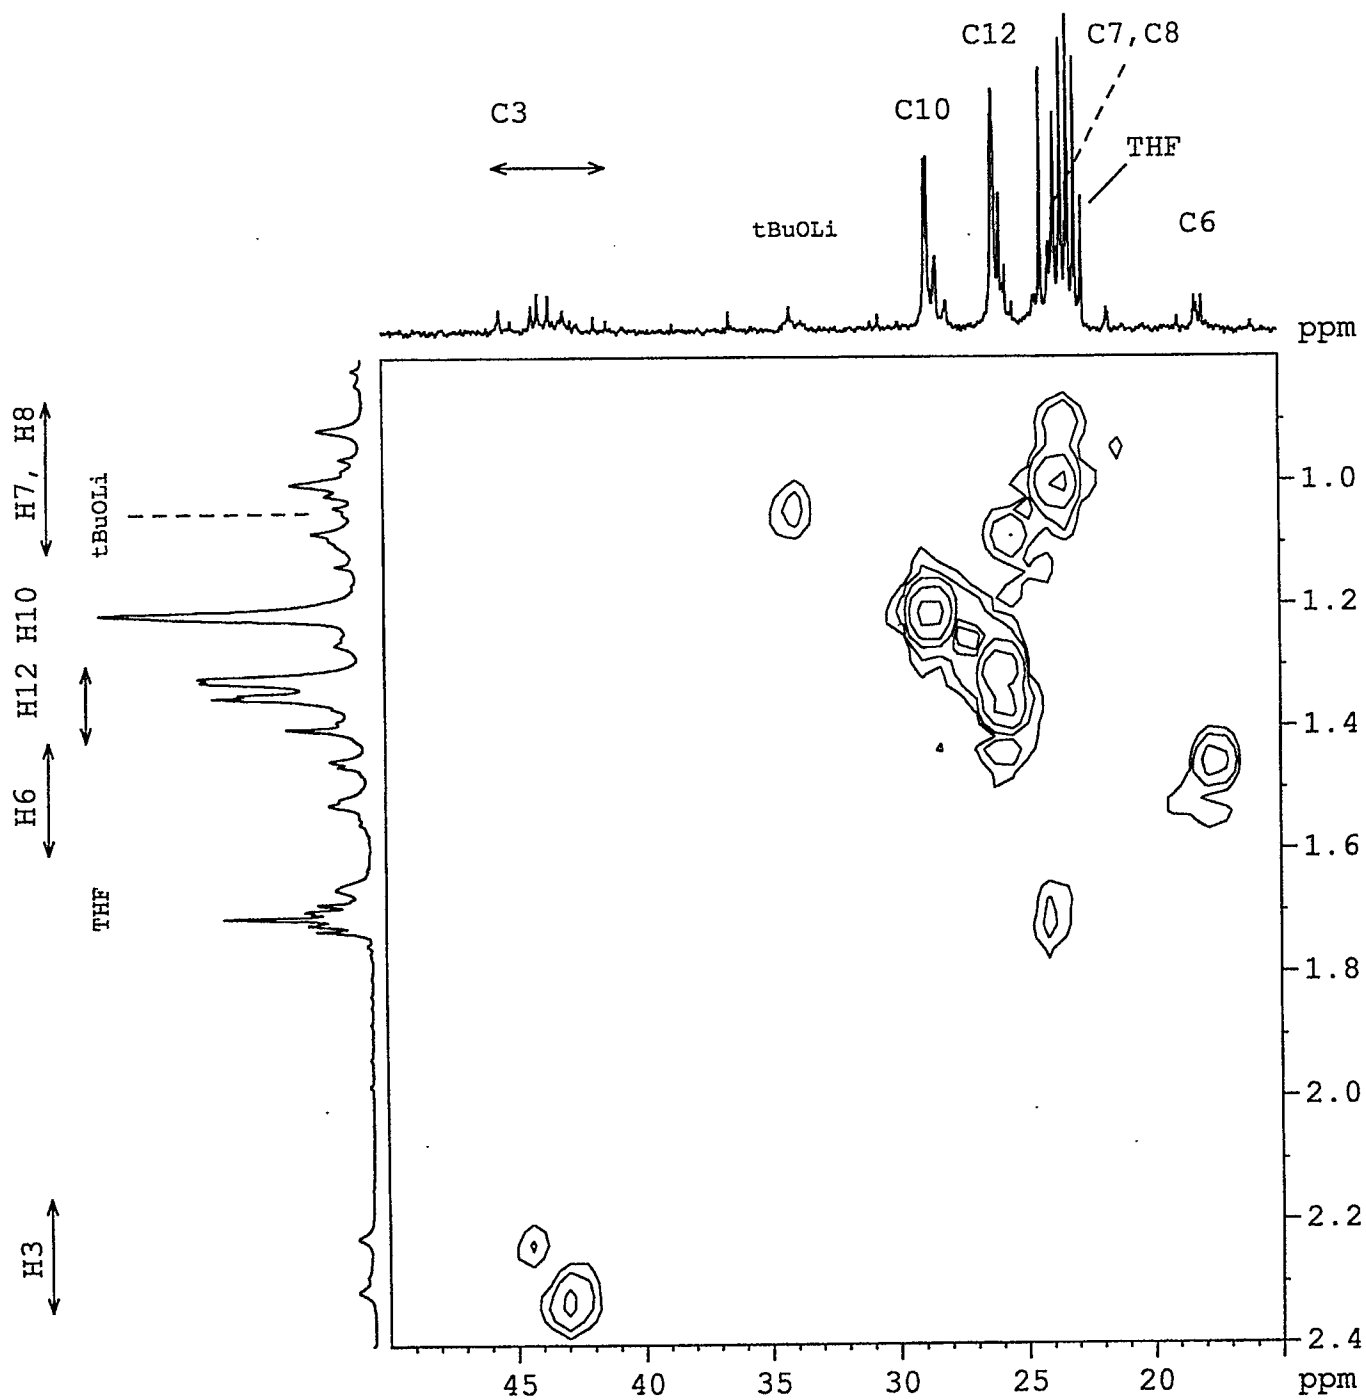

Page 5:  $^1\text{H}$ - $^{13}\text{C}$  long-range COSY (COLOC) NMR spectrum of the mixture of **A** (0.2 mol/l) with 4 equivalents of **LiOEtM** in  $\text{THF-d}_8$  at 253 K.

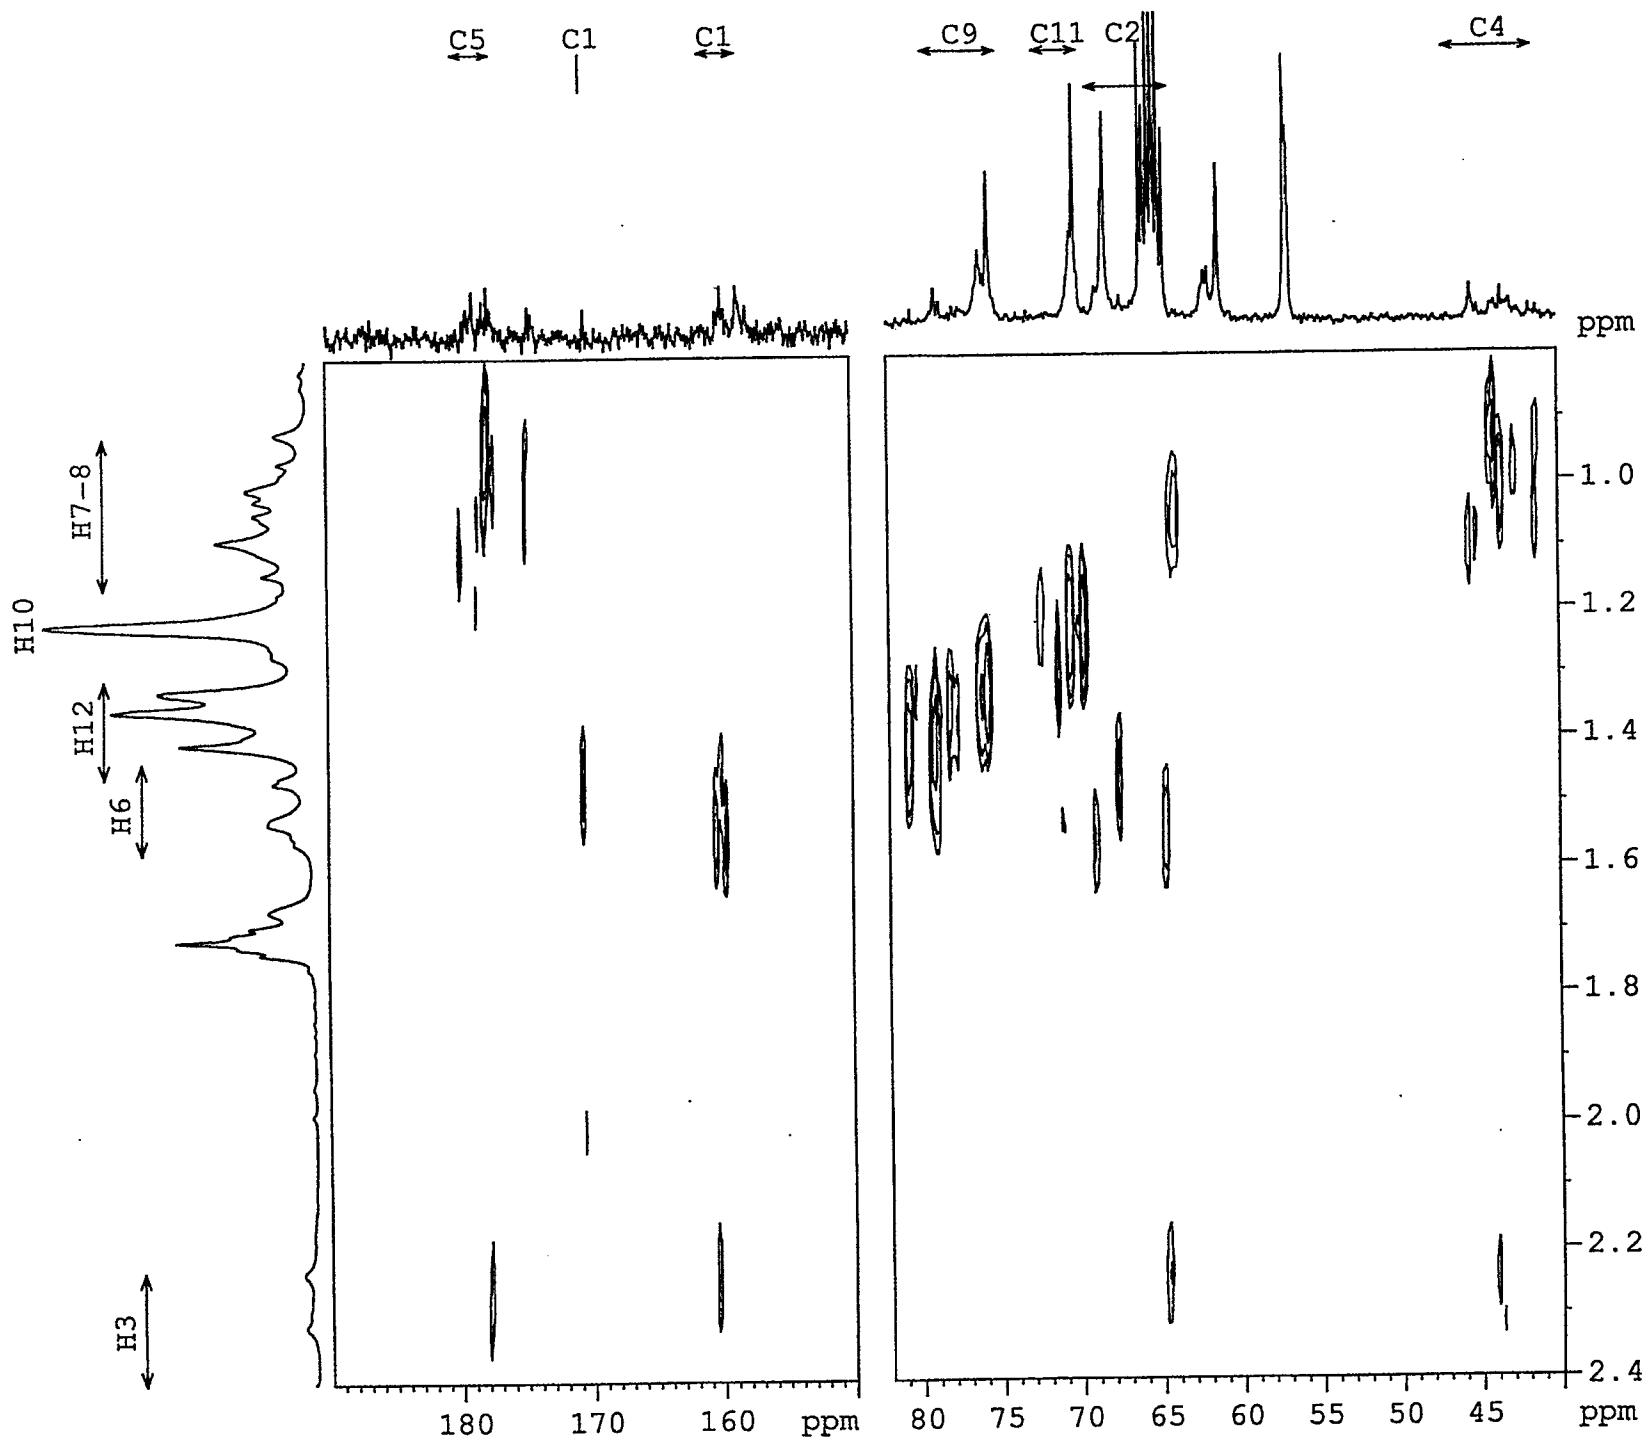

Supplement: Supplementary file 1 [file 5824326]
